# Supplementary material for: MaqFACS (Macaque Facial Action Coding System) can be used to document facial movements in Barbary macaques (Macaca sylvanus)
Source: PeerJ. 2015 Sep 15;3:e1248. doi: 10.7717/peerj.1248 (PMC4579026; doi:10.7717/peerj.1248)
Supplement: Supplemental Information 9 — Table detailing the presence of each AU in each video for the 3 coding sessions [file peerj-03-1248-s009.xlsx]

## Sheet: Session1
clip	Apex time (if needed)	AU1+2	AU41	AU6	AU8	AU9+10	AU10	AU12	AU16	AU17	AU18i	AU18ii	AU25	AU26	AU27	EAU1	EAU2	EAU3	AD181	Notes	Notes	# of participant A codes	# of agreements between test and participant A	# of master test codes
BarbFACS_clip01	00:03:00					1		1	1				1		1						movements of ears not visible here	5	5	6
BarbFACS_clip02	00:03:00						1													2 times R10 (unilateral)	R10	1	1	2
BarbFACS_clip03							1											1		unilateral R10	R10 (end of M011)	2	1	2
BarbFACS_clip04							1	1			1		1	1						R10 unilateral	R10,L12; blink or AU4	5	4	6
BarbFACS_clip05		1	1																		subtle	2	2	2
BarbFACS_clip06			1																		L1+2	1	0	1
BarbFACS_clip07																		1				1	0	3
BarbFACS_clip08			1				1						1		1						L10	4	4	5
BarbFACS_clip09	00:09:00											1	1	1								3	3	4
BarbFACS_clip10	00:09:00							1					1	1						unilateral L12	R1+2 more pronounced	3	2	3
BarbFACS_clip11		1									1											2	2	2
BarbFACS_clip12	00:08:00					1		1	1				1		1						scream	5	5	6
BarbFACS_clip13		1																		1+2 and L1+2 unialteral	uni+bilateral 1+2	1	1	1
BarbFACS_clip14							1		1		1		1		1					17 and 18i later		5	3	6
BarbFACS_clip15		1																				1	1	2
BarbFACS_clip16													1	1							quick scream	2	2	3
BarbFACS_clip17	00:05:00	1										1	1	1								4	3	4
BarbFACS_clip18							1	1				1	1	1					1		TH then lip-smacking	6	4	7
BarbFACS_clip19							1		1				1	1	1					26 at the beginning then 27	TH then yawn	5	5	8
BarbFACS_clip20	00:05:00												1		1							2	1	4
BarbFACS_clip21		1																			chewing	1	1	1
BarbFACS_clip22	00:03:00	1									1		1	1								4	4	4
BarbFACS_clip23	00:02:00	1																				1	1	4
BarbFACS_clip24	00:03+00:06	1					1		1				1		1						00:06=scream	5	4	5
BarbFACS_clip25	2 apexes: 00:03+00:06		1													1		1				3	3	4
BarbFACS_clip26		1																			slow 181	1	1	4
BarbFACS_clip27		1																		there is ear movement but not sure which one		1	1	3
BarbFACS_clip28				1			1		1				1		1							5	5	8
BarbFACS_clip29		1									1		1	1					1	181 very short		5	4	4
BarbFACS_clip30																1						1	1	2
BarbFACS_clip31		1																				1	1	2
BarbFACS_clip32													1	1								2	2	5
BarbFACS_clip33			1				1		1		1		1	1					1	18i at the end		7	3	6
BarbFACS_clip34				1			1		1				1		1							5	5	6
BarbFACS_clip35											1		1	1		1						4	4	5
BarbFACS_clip36							1		1				1		1							4	4	6
BarbFACS_clip37								1												R12 unilateral	R12	1	1	2
BarbFACS_clip38		1																				1	1	1
BarbFACS_clip39		1									1		1	1								4	3	5
																						116	98	154
																						0.725926	Wexler's test/coder A
		AU1+2	AU41	AU6	AU8	AU9+10	AU10	AU12	AU16	AU17	AU18i	AU18ii	AU25	AU26	AU27	EAU1	EAU2	EAU3	AD181
	# of participant A codes Session2	15	5	2	0	2	12	6	9	0	8	3	22	13	10	3	0	3	3
		15	3	2	0	2	11	5	8	0	4	1	22	12	6	3	0	1	2
	# of master test codes	32	7	4	5	3	11	7	8	2	7	2	24	18	6	6	5	0	3
	Wexler's test/coder A per AUs	0.638298	0.5	0.666667	0	0.8	0.956522	0.769231	0.941176	0	0.533333	0.4	0.956522	0.774194	0.75	0.666667	0	0.666667	0.666667

## Sheet: Session2
clip	Apex time (if needed)	AU1+2	AU41	AU6	AU8	AU9+10	AU10	AU12	AU16	AU17	AU18i	AU18ii	AU25	AU26	AU27	EAU1	EAU2	EAU3	AD181	Notes	Notes	# of participant A codes Session1	# of participant A codes Session2	# of agreements between test and participant A	# of master test codes
BarbFACS_clip01	00:03:00					1		1	1				1		1						movements of ears not visible here	5	5	5	6
BarbFACS_clip02	00:03:00	1					1													2x R10	R10	1	2	2	2
BarbFACS_clip03							1									1				R10	R10 (end of M011)	2	2	2	2
BarbFACS_clip04			1		1		1	1					1	1						R10	R10,L12; blink or AU4	5	6	6	6
BarbFACS_clip05		1	1																		subtle	2	2	2	2
BarbFACS_clip06		1																1			L1+2	1	2	1	1
BarbFACS_clip07																		1				1	1	0	3
BarbFACS_clip08			1		1		1		1				1		1					first 27+16+10 then 27+8	L10	4	6	5	5
BarbFACS_clip09	00:09:00											1	1	1								3	3	3	4
BarbFACS_clip10	00:09:00		1					1					1	1						L12	R1+2 more pronounced	3	4	2	3
BarbFACS_clip11		1									1											2	2	2	2
BarbFACS_clip12	00:08:00					1		1	1				1		1						scream	5	5	5	6
BarbFACS_clip13		1																		at one point L1+2 else only 1+2	uni+bilateral 1+2	1	1	1	1
BarbFACS_clip14			1	1		1			1		1		1		1					at the end 18i		5	7	4	6
BarbFACS_clip15		1																		chewing		1	1	1	2
BarbFACS_clip16													1	1							quick scream	2	2	2	3
BarbFACS_clip17	00:05:00	1										1	1	1								4	4	3	4
BarbFACS_clip18		1					1				1		1	1					1		TH then lip-smacking	6	6	6	7
BarbFACS_clip19			1	1	1		1		1				1	1	1					8+26 at the beginning, later 27+10+16	TH then yawn	5	8	7	8
BarbFACS_clip20	00:05:00	1											1	1							98 or 99 not both	2	3	3	4
BarbFACS_clip21		1																			chewing	1	1	1	1
BarbFACS_clip22	00:03:00	1									1		1	1								4	4	4	4
BarbFACS_clip23	00:02:00	1																				1	1	1	4
BarbFACS_clip24	00:03+00:06	1					1		1			1	1		1					first 18ii turns then into a 27	00:06=scream	5	6	4	5
BarbFACS_clip25	2 apexes: 00:03+00:06	1	1													1			1			3	4	3	4
BarbFACS_clip26		1																			slow 181	1	1	1	4
BarbFACS_clip27		1																		ear movement but hard to identify which		1	1	1	3
BarbFACS_clip28			1	1			1		1				1		1							5	6	6	8
BarbFACS_clip29		1									1		1	1								5	4	4	4
BarbFACS_clip30		1														1						1	2	2	2
BarbFACS_clip31		1																1				1	2	1	2
BarbFACS_clip32		1											1	1								2	3	3	5
BarbFACS_clip33		1					1				1		1					1	1			7	6	4	6
BarbFACS_clip34			1		1		1		1				1		1							5	6	5	6
BarbFACS_clip35		1									1		1	1		1						4	5	4	5
BarbFACS_clip36				1			1		1				1		1							4	5	5	6
BarbFACS_clip37								1												R12	R12	1	1	1	2
BarbFACS_clip38		1																				1	1	2	1
BarbFACS_clip39		1	1								1		1	1								4	5	3	5
																						116	136	117	154
																							0.806897	Wexler's test/coder A
		AU1+2	AU41	AU6	AU8	AU9+10	AU10	AU12	AU16	AU17	AU18i	AU18ii	AU25	AU26	AU27	EAU1	EAU2	EAU3	AD181
	# of participant A codes Session2	24	10	4	4	3	11	5	9	0	8	3	22	13	9	4	0	4	3
		24	7	3	2	3	11	4	7	0	5	1	22	13	6	3	0	0	2
	# of master test codes	32	7	4	5	3	11	7	8	2	7	2	24	18	6	6	5	1	3
	Wexler's test/coder A per AUs	0.857143	0.823529	0.75	0.444444	1	1	0.666667	0.823529	0	0.666667	0.4	0.956522	0.83871	0.8	0.6	0	0	0.666667

## Sheet: Session3
clip	Apex time (if needed)	AU1+2	AU41	AU6	AU8	AU9+10	AU10	AU12	AU16	AU17	AU18i	AU18ii	AU25	AU26	AU27	EAU1	EAU2	EAU3	AD181	Notes	# of participant A codes Session2	# of agreements between test and participant A	# of master test codes
M004	00:06:00	1														1					2	2	2
M011							1			1				1						R10	3	3	3
M019		1														1					2	1	2
M026		1																			1	1	2
M032	00:01:00						1	1					1	1							4	4	5
M040		1																			1	1	1
M043		1							1				1		1	1					5	5	6
M050		1																1			2	1	2
M057		1	1	1			1		1				1		1					10 during yawn + R10 later	7	6	6
M064		1	1	1			1		1				1		1						7	6	6
M073											1		1	1					1		4	3	4
M094		1	1	1			1		1				1		1						7	6	6
M102	00:02:00	1									1		1	1							4	4	4
M111	00:03:00	1					1	1	1				1		1						6	5	5
M125		1														1					2	2	3
M146			1															1			2	1	1
M158		1	1	1			1		1				1		1						7	7	7
M175			1	1			1	1	1				1		1						7	6	6
M182		1					1		1				1		1						5	3	4
M186	00:02:00			1		1			1				1		1						5	5	6
																					83	72	81
																						0.878049	Wexler's test/coder A
		AU1+2	AU41	AU6	AU8	AU9+10	AU10	AU12	AU16	AU17	AU18i	AU18ii	AU25	AU26	AU27	EAU1	EAU2	EAU3	AD181
	# of participant A codes Session2	14	6	6	0	1	9	3	9	1	2	0	12	4	9	4	0	2	1
		8	5	6	0	1	8	2	9	1	1	0	12	4	8	4	0	1	1
	# of master test codes	8	9	7	1	1	8	3	9	1	1	0	12	5	8	5	0	1	2
	Wexler's test/coder A per AUs	0.727273	0.666667	0.923077	0	1	0.941176	0.666667	1	1	0.666667	1	1	0.888889	0.941176	0.888889	1	0.666667	0.666667

## Sheet: Agreement per AU
	General Agreement	Agreemen per AU
		AU1+2	AU41	AU6	AU8	AU9+10	AU10	AU12	AU16	AU17
Session1	0.725926	0.638298	0.5	0.666667	0	0.8	0.956522	0.769231	0.941176	0
Session1.2	0.81	0.857143	0.823529	0.75	0.444444	1	1	0.666667	0.823529	0
Session2	0.88	0.727273	0.666667	0.923077	0	1	0.941176	0.666667	1	1
		AU18i	AU18ii	AU25	AU26	AU27	EAU1	EAU2	EAU3	AD181
		0.533333	0.4	0.956522	0.774194	0.75	0.666667	0	0.666667	0.666667
		0.666667	0.4	0.956522	0.84	0.8	0.6	0	0	0.666667
		0.666667	1	1	0.888889	0.941176	0.888889	1	0.666667	0.666667
	mean Wexler agreement	AU1+2	AU41	AU6	AU8	AU9+10	AU10	AU12	AU16	AU17	AU18i	AU18ii	AU25	AU26	AU27	EAU1	EAU2	EAU3	AD181
	0.584467	0.638298	0.5	0.666667	0	0.8	0.956522	0.769231	0.941176	0	0.533333	0.4	0.956522	0.774194	0.75	0.666667	0	0.666667	0.666667
	0.61501	0.857143	0.823529	0.75	0.444444	1	1	0.666667	0.823529	0	0.666667	0.4	0.956522	0.84	0.8	0.6	0	0	0.666667
	0.813545	0.727273	0.666667	0.923077	0	1	0.941176	0.666667	1	1	0.666667	1	1	0.888889	0.941176	0.888889	1	0.666667	0.666667
